# Supplementary material for: Bimetallic nickel/manganese phosphate–carbon nanofiber electrocatalyst for the oxidation of formaldehyde in alkaline medium
Source: Royal Society of Chemistry journal article supplement (doi:10.1039/d2ra03359c), 2022-01-01
Supplement: d2ra03359c1.pdf [file d2ra03359c1.pdf]

## Supplementary Information

### **Bimetallic Nickel / Manganese Phosphates-Carbon Nanofibers Electrocatalyst for the Oxidation of Formaldehyde in Alkaline Medium**

Ibrahim Elghamry<sup>a\*</sup>, Samya A. Al-Jendan<sup>a\*</sup>, M.M.Saleh<sup>a</sup>, Mamdouh E. Abdelsalam<sup>a</sup>

<sup>a</sup>Department of Chemistry, College of Science, King Faisal University, P.O. Box 400, Al-Ahsa, 31982, Saudi Arabia.

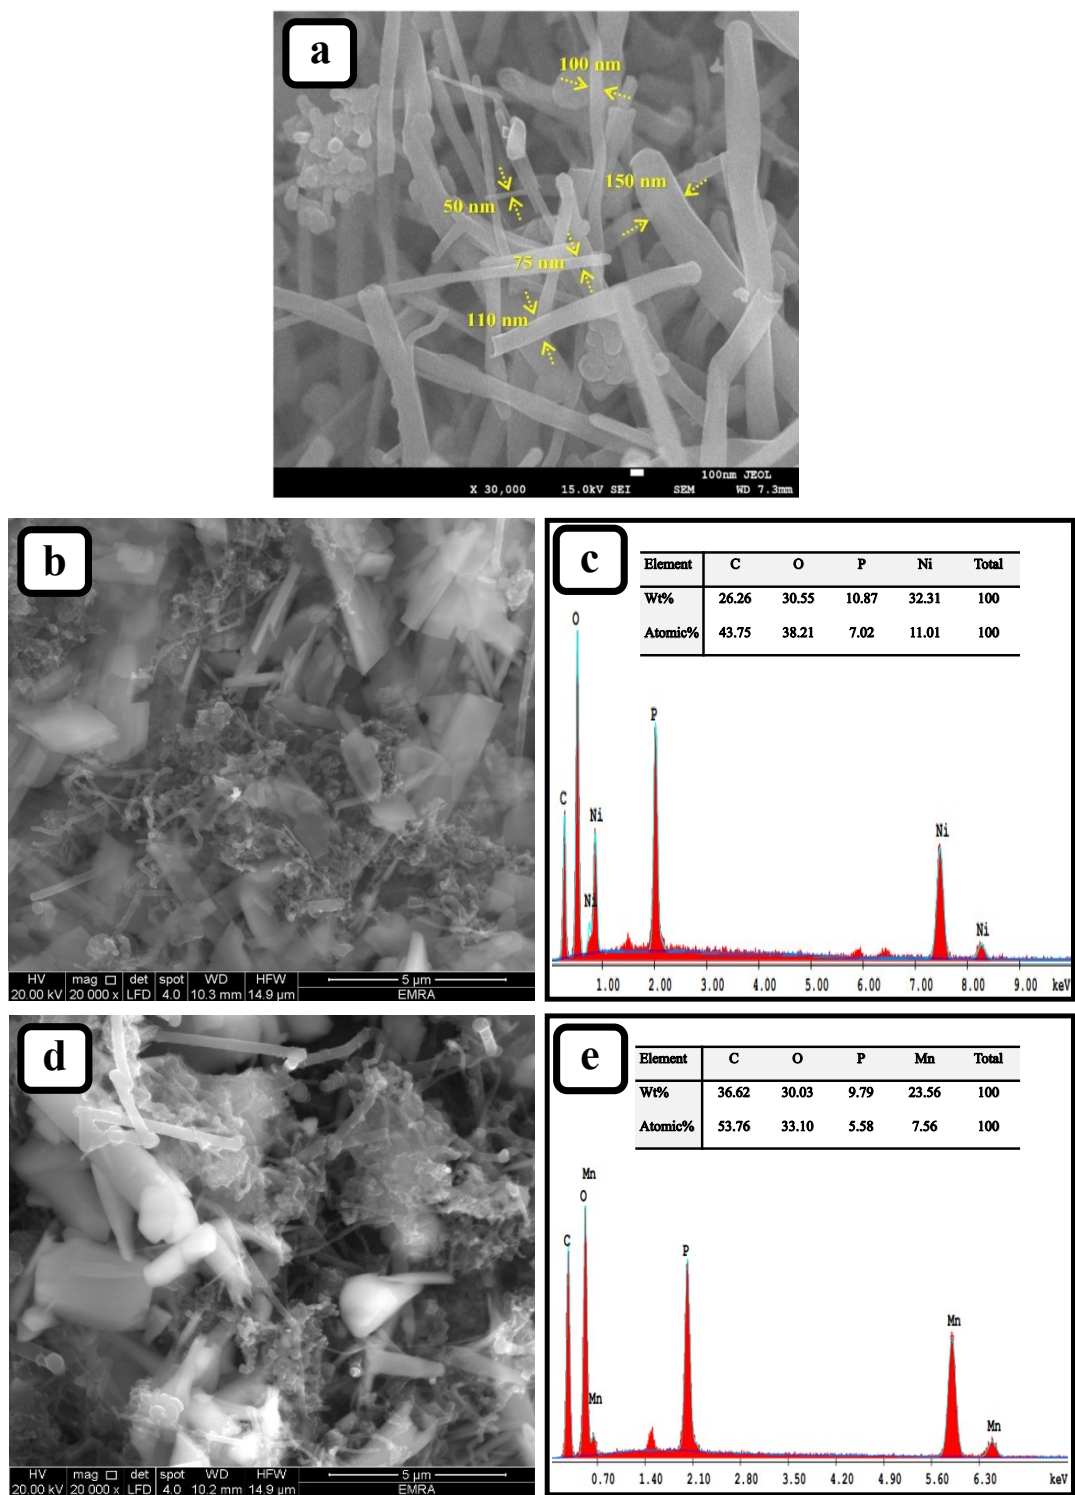

**Fig.S1.** FE-SEM image of (a) CNFs, (b) NiPh/CNFs, (d) MnPh/CNFs, and the corresponding EDX pattern of NiPh/CNFs (c), MnPh/CNFs (e).

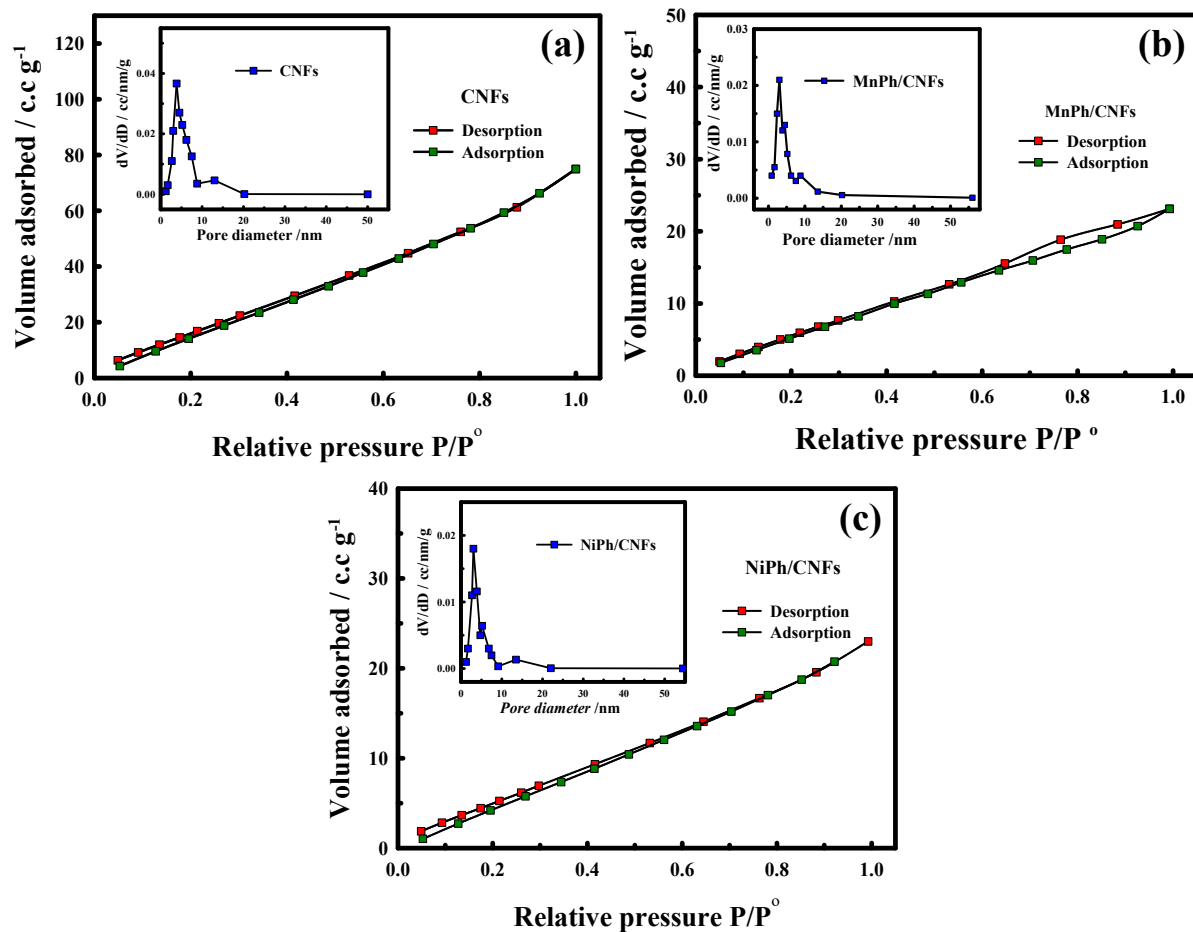

**Fig.S2.** Nitrogen ( $N_2$ ) adsorption/desorption isotherm curve of (a) CNFs, (b) MnPh/CNFs (c) NiPh/CNFs. BJH curves of materials are indicated in a,b, c insets.

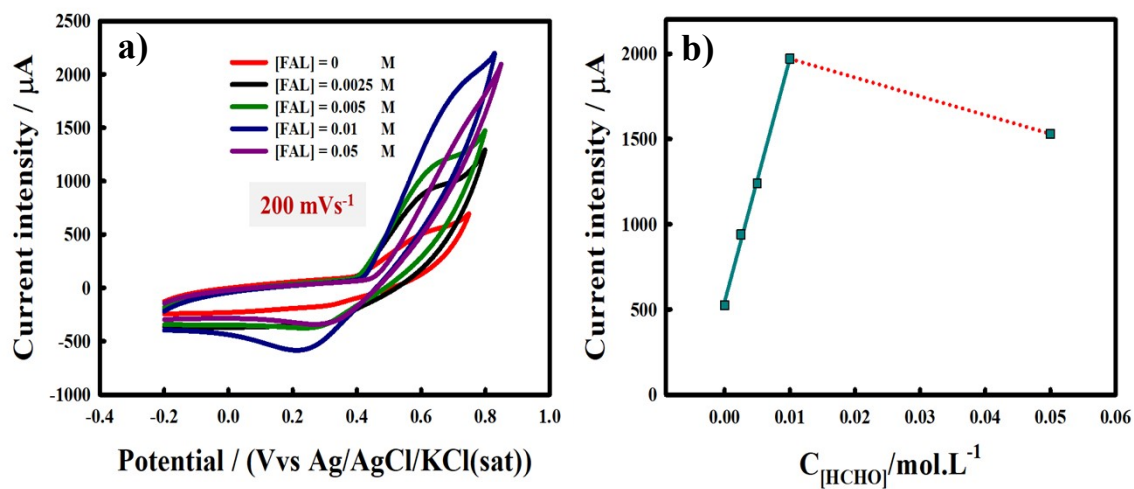

**Figure. S3.** (a) Cyclic voltammograms for Ni/MnPh-CNFs in 0.25M KOH containing different concentrations of formaldehyde (0M, 0.0025M, 0.005M, 0.01M, 0.05M), at scan rate of  $200 \text{ mVs}^{-1}$ . (b) The plot of  $I_{\text{pa}}$  vs different concentration of formaldehyde.
